1 **Multiple selection signatures in farmed Atlantic salmon adapted**  
2 **to different environments across Hemispheres**

3

4 **Running title:** Selection signatures in farmed Atlantic salmon

5

6 López M.E.<sup>a,b</sup>, Linderoth T.<sup>c</sup>, Norris, A.<sup>d</sup>, Lhorente J.P.<sup>e</sup>, Neira R.<sup>f</sup>, & Yáñez J.M.<sup>a,e,g\*</sup>

7

8 <sup>a</sup> Facultad de Ciencias Veterinarias y Pecuarias, Universidad de Chile, Santiago, Chile.

9

10 <sup>b</sup> Department of Animal Breeding and Genetics, Swedish University of Agricultural  
11 Sciences, Uppsala, Sweden.

12

13 <sup>c</sup> Department of Integrative Biology, University of California, Berkeley, CA, USA.

14

15 <sup>d</sup> Marine Harvest, Kindrum, Fanad, C. Donegal, Ireland.

16

17 <sup>e</sup> Benchmark Genetics Chile, Puerto Montt, Chile.

18

19 <sup>f</sup> Facultad de Ciencias Agronómicas, Universidad de Chile, Santiago, Chile.

20

21 <sup>g</sup> Núcleo Milenio INVASAL, Concepción, Chile.

22

23

24

25 **CORRESPONDENCE:**

26 Dr. José Manuel Yáñez

27 [jmayanez@uchile.cl](mailto:jmayanez@uchile.cl)

28 **1. ABSTRACT**

29 Domestication of Atlantic salmon started approximately forty years ago, using both  
30 artificial and natural selection strategies. Such selection methods are likely to have imposed  
31 distinctive selection signatures on the salmon genome. Therefore, identifying differences in  
32 selection signatures may give insights into the mechanism of selection and candidate genes  
33 of biological and productive interest. Here, we used two complementary haplotype-based  
34 statistics, the within-population integrated Haplotype Score test ( $|iHS|$ ) and the cross-  
35 population Extended Haplotype Homozygosity test (XP-EHH) to compare selection  
36 signatures in four populations of Atlantic salmon with a common genetic origin. Using  
37  $|iHS|$  we found 24, 14, 16 and 26 genomic regions under selection in Pop-A, Pop-B, Pop-C,  
38 and Pop-D, respectively. While using the XP-EHH test we identified 27, 25 and 15  
39 potential selection regions in Pop-A/Pop-B, Pop-A/Pop-C and Pop-A/Pop-D, respectively.  
40 These genomic regions harbor important genes such *igf1r* and *sh3rf1* which have been  
41 associated with growth related traits in other species. Our results contribute to the detection  
42 of candidate genes of interest and help to understand the evolutionary and biological  
43 mechanisms for controlling complex traits under selection in Atlantic salmon.

44

45

46

47 **Keywords**

48 Selection signatures, *Salmo salar*, domestication, SNP data, artificial selection.

49

50

51

52

53

54

55

56

## 57 2. BACKGROUND

58 Atlantic salmon (*Salmo salar* L) were first farmed in Norway during the 1960s, and have  
59 now become one of the most important aquaculture species (FAO 2016). Despite a  
60 generation interval of three to four years, breeding programs have achieved rapid  
61 improvement of economically important traits such as growth, sexual maturation and  
62 disease resistance (GJEDREM *et al.* 2012). One of the first farmed populations named Mowi  
63 strain, was established with fish from west coast rivers in Norway, with major contributions  
64 from River Bolstad in the Vosso watercourse, River Årøy and possibly from the  
65 Maurangerfjord area (VERSPOOR *et al.* 2007). Salmon from the Vosso and Årøy rivers are  
66 characterized by large size and late maturity (VERSPOOR *et al.* 2007). Phenotypic selection  
67 for growth, late maturation and fillet quality was the focus in this population until 1999  
68 (GLOVER *et al.* 2009). Ova from this population were imported into Fanad Peninsula,  
69 Ireland between 1982 and 1986 to establish an Irish-farmed population (NORRIS 1999).  
70 Similarly, ova from this Irish farmed population were introduced to Chile in the early  
71 1990s. These stocks were subsequently adapted to the biotic and abiotic factors present in  
72 southern hemisphere conditions. Artificial selection and adaptation to captive environments  
73 has left detectable genomic patterns in farmed Atlantic salmon populations, as evidenced  
74 by differences between wild and farmed populations for several traits, such as growth rate  
75 (THODESEN *et al.* 1999; GLOVER *et al.* 2009; SOLBERG *et al.* 2012), predator awareness  
76 (EINUM AND FLEMING 1997) and gene transcription patterns (ROBERGE *et al.* 2006; BICSKEI  
77 *et al.* 2014; CHRISTIE *et al.* 2016).

78

79 Domestication processes are likely to have exerted selection pressures on certain genomic  
80 regions that underlie traits of human interest or other traits involved in adaptation to captive  
81 environments. Accordingly, positive selection pressures will cause the frequency of alleles  
82 underlying favorable traits to increase rapidly in these domesticated populations. Linkage  
83 disequilibrium between favorable mutations and neighboring loci will increase and spread,  
84 given there is little opportunity for recombination over the brief time since the onset of  
85 intense selection (SABETI *et al.* 2002). Analyses of these selection signatures in domestic  
86 animals can provide further insights into the genetic basis of adaptation to diverse  
87 environments and genotype/phenotype relationships (OLEKSYK *et al.* 2010; ANDERSSON

88 2012). Access to genomic data through next-generation sequencing and high-throughput  
89 genotyping technologies have made the comparison of genomic patterns of SNP variation  
90 between different livestock breeds possible, allowing for the identification of putative  
91 genomic regions and genes under selection in various species including cattle (FLORI *et al.*  
92 2009), horses (PETERSEN *et al.* 2013; FRISCHKNECHT *et al.* 2016), sheep (KIJAS *et al.* 2012;  
93 FARIELLO *et al.* 2014), pigs (AMARAL *et al.* 2011), Atlantic salmon (VASEMÄGI *et al.* 2005;  
94 VASEMÄGI *et al.* 2012; MÄKINEN *et al.* 2014; GUTIERREZ *et al.* 2015; LÓPEZ *et al.* 2018)  
95 and tilapia (HONG XIA *et al.* 2015).

96  
97 There are several approaches for detecting selection signatures in the genome, one of which  
98 relies on the length or variability of haplotypes. Directional selection acting on a new  
99 beneficial mutation results in the haplotype harboring the mutation to increase in frequency  
100 and to be longer than average. In order to exploit this, Sabeti *et al.* (2002), proposed the  
101 extended haplotype homozygosity (EHH) statistic to detect of positive selection in a  
102 population, which is specifically the probability that two randomly selected haplotypes are  
103 identical-by-descent over their entire length around a core SNP (Sabeti *et al.* 2002). This  
104 concept forms the basis for other haplotype homozygosity based metrics, such as the  
105 relative EHH (REHH) (SABETI *et al.* 2002) and the widely-used integrated Haplotype Score  
106 ( $|iHS|$ ) (VOIGHT *et al.* 2006).  $|iHS|$  compares EHH between derived and ancestral alleles  
107 within a population and has the most power to detect selection when the selected allele is at  
108 intermediate frequencies in the population (SABETI *et al.* 2006; VOIGHT *et al.* 2006). To  
109 detect selection signatures between populations, the cross-population Extended Haplotype  
110 Homozygosity test (XP-EHH) compares the integrated EHH profiles between two  
111 populations at the same SNP. It was designed to detect ongoing or nearly fixed sites  
112 harboring selection in one population (SABETI *et al.* 2007).

113 Although previous studies have already been carried out to detect selection signatures in  
114 Atlantic salmon (MÄKINEN *et al.* 2014; GUTIERREZ *et al.* 2015; LIU *et al.* 2016; LÓPEZ *et al.*  
115 2018) exploration of selection signatures in additional populations will illuminate how  
116 genetic variation among the different strains, adapted to different culture conditions, across  
117 hemispheres has not been assessed yet. Herein we used an Affymetrix 200K SNP array  
118 dataset to investigate selection signatures in farmed Atlantic salmon populations from the

119 same origin, cultivated in Ireland and Chile. We identified several selection signatures  
120 using two haplotype-based approaches (*iHS* and *XPEHH*) at the whole genome level in  
121 four Atlantic salmon populations. These findings are important as they highlight regions of  
122 the genome that might benefit economically relevant attributes, such as growth, resistance  
123 to local diseases and adaptation to specific environmental conditions.

124

### 125 **3. MATERIALS AND METHODS**

#### 126 **Samples, genotyping and quality control.**

127

128 We used a total of 270 individuals from four farmed Atlantic salmon populations of  
129 Norwegian origin (Pop-A,  $n = 40$ ; Pop-B,  $n = 71$ ; Pop-C,  $n = 85$ ; Pop-D,  $n = 74$ ). Pop-A  
130 fish are from the Irish strain (Fanad) originating from the west coast Rivers of Norway, as  
131 described in the Introduction section. Artificial selection for improving growth, maturity  
132 and fillet quality was applied from the beginning in this population (GLOVER *et al.* 2009).  
133 We estimated that this population had been under artificial selection for at least ten  
134 generations. Pop-B and Pop-C are two different Chilean populations, established with fish  
135 from two different year classes of the same Irish strain (Fanad) in the 1990s. Pop-B and  
136 Pop-C have been farmed and adapted to the Los Lagos Region, Chile ( $42^{\circ}\text{S } 72^{\circ}\text{O}$ ). Pop-D  
137 is another Chilean population founded with fish from the same Irish farmed strain but  
138 adapted to the XII<sup>nd</sup> Region, Magallanes, Chile ( $53^{\circ}\text{S } 70^{\circ}\text{O}$ ). Pop-B, Pop-C and Pop-D  
139 populations experienced four generations of selective breeding for growth in Chilean  
140 farming conditions at the time of sampling.

141

142 Genotyping of all populations was performed using Affymetrix's Atlantic salmon 200K  
143 SNP Chip described in YÁÑEZ *et al.* (2016). We assessed SNP quality control using Axiom  
144 Genotyping Console (GTC, Affymetrix) and SNPlisher (an R package developed by  
145 Affymetrix) *i*) removing SNPs that did not match with high quality clustering patterns,  
146 according to the best practices recommended by Affymetrix, *ii*) removing SNPs with call  
147 rate lower than 95% and *iii*) we discarded individuals with genotyping call rate under 90%.  
148 We used only SNPs that mapped to chromosomes in the newest version of the Atlantic

149 salmon reference genome, ICSAG\_v2 (GenBank: GCA\_000233375.4). After quality  
150 control filtering, 146,102 SNPs remained for downstream analyses.

151

## 152 **Genetic diversity and population structure**

153

154 We evaluated genetic diversity in terms of the observed heterozygosity ( $H_O$ ) and expected  
155 heterozygosity ( $H_E$ ) calculated with PLINK v1.07 (PURCELL *et al.* 2007). To investigate  
156 population structure based on individual ancestry proportions, we performed model-based  
157 clustering assuming no prior knowledge about strain origins in ADMIXTURE 1.2.2  
158 (ALEXANDER *et al.* 2009). We performed 10 separate randomly seeded runs for each  
159 number K of ancestral populations ( $1 < K < 20$ ) and selected the optimum K according to the  
160 lowest value of the cross-validation error. The aforementioned analyses were conducted  
161 using a total of 20,000 SNPs after retaining only those with linkage disequilibrium (LD)  
162 values of at most 0.2 to minimize possible confounding effects of LD on the underlying  
163 patterns of genetic structure.

164

## 165 **Selection signatures, gene annotation and functional analyses**

166

167 To detect potentially regions harboring selection signatures, two complementary haplotype-  
168 based detection methods, *iHS* and *XPEHH*, were used for within and between population  
169 analyses, respectively.

170 **Detection of within-population selection signatures using *iHS*.** The *iHS* score is based  
171 on the ratio of extended haplotype homozygosity (EHH) for haplotypes anchored with the  
172 ancestral versus derived allele. The ancestral allele state for salmon is unknown and so to  
173 avoid losing SNPs by trying to polarize them from publicly available outgroup references,  
174 we assumed that the major allele represented the ancestral state as used by Bahbahani *et al*  
175 (2015). We phased the haplotypes using Beagle (BROWNING AND BROWNING 2009). Single-  
176 site *iHS* values were calculated across the genome for each population.  $|iHS|$  scores were  
177 calculated using the REHH package (GAUTIER AND VITALIS 2012) and a score threshold of  
178 3.0 was used to infer candidate genomic regions under selection.

179

180 **Detection of between-population selection signatures using *XP-EHH*.** The XP-EHH  
181 statistic compares the integrated EHH between two populations at the same SNP, in order  
182 to identify selection based on overrepresented haplotypes in one of the populations,  
183 detecting entirely or approximately fixed sites (SABETI *et al.* 2007). The direction of  
184 selection can be determined from the sign of XP-EHH scores, whereby negative XP-EHH  
185 scores suggest selection in the ‘reference’ population, whereas positive scores suggest  
186 selection in the ‘observed’ population. Pop-A was used as the reference population to the  
187 other three populations, hence there were three pairs of comparisons.

188

### 189 **Gene functional annotation**

190 Genomic regions harboring SNPs showing evidence of selection were annotated based on  
191 the ICSAG\_v2 reference genome (LIEN *et al.* 2016) using SnpEff (CINGOLANI *et al.* 2012).  
192 Gene transcripts from these candidate regions were aligned (using blastx) (ALTSCHUL *et al.*  
193 1990) to the zebra fish (*Danio rerio*) peptide reference database (downloaded from  
194 <http://www.ensembl.org/>) to determine gene identify. As evidence of homology we used an  
195 e-value  $\leq 0$  and then retrieved the zebra fish gene identifiers and gene ontology (GO)  
196 information from the ensembl biomart database (<http://www.ensembl.org/biomart>).

197

## 198 **4. RESULTS**

### 199 **Genetic diversity and structure.**

200

201 We investigated genetic diversity within each population using SNPs filtered for missing  
202 data per individual (max 10%), missing data per marker (max 5%) and allele frequency  
203 (min 5%) as described in the Materials and Methods section. A total of 146,103 SNPs were  
204 retained for analyses after these quality control steps. Observed heterozygosity levels were  
205 similar across the four domestic populations. And was slightly higher than expected for  
206 populations A, B and C, and even higher in population D (See Table 1).

207 Admixture analysis was used to determine the composition of ancestral lineages among  
208 individuals to offer insight into the observed genetic variation. We found K=12 ancestral  
209 lineages to be optimal in describing the ancestry of the individuals across the 4 populations  
210 (Figure 1).

211

## 212 **Candidate regions under selection - |iHS|**

213 We used the haplotype-based |iHS| test to look for selection within populations. For each  
214 population we defined candidate selection regions using the thresholds of |iHS| > 3 (Figure  
215 2 and Table 2). Candidate regions were retained if two SNPs separated by  $\leq 500$  Kb passed  
216 this threshold and were annotated using the positions of the first and last SNP as  
217 boundaries, extending 500 Kb to each side. In Pop-A we identified 120 markers putatively  
218 under selection among ten chromosomes, Ssa02 and Ssa10 combined had approximately 60  
219 SNPs. The highest score ( $-\log(\text{p-value}) = 5.04$ ) was found in Ssa05 in a region of 6,7 Kb,  
220 associated with the CR762469.1 gene; other high scores were found in Ssa10 and Ssa01,  
221 nearby to *mipol1*, *furinb*, *csnk1g2a* and *rs17*. Other candidate genes undergoing selection  
222 for this population are shown in Supplementary Table S1.

223

224 In Pop-B fourteen regions passed the threshold, distributed among eight chromosomes  
225 (Ssa1, 6, 10, 12, 13, 14, 16, and 27). The highest score was in Ssa06, harboring the SASH1  
226 gene. Ssa01 and Ssa13 encompassed 4 and 3 regions under selection, respectively,  
227 spanning from 11 Kb to 228 Kb. A total of 24 genes were located in these regions  
228 (Supplementary Table S1).

229

230 In Pop-C |iHS| detected 121 SNPs passing the threshold and we annotated sixteen genomic  
231 regions. Ssa22 showed the highest scores and larger regions under selection, harboring  
232 genes such *kcnkf*, *sc61a*, *mapk3*, *f264* and *cdh2*. Ssa16 and Ssa19 also exhibited high |iHS|  
233 scores spanning regions 3 Kb to 1788 Kb.

234

235 Finally, Pop-D presented the highest number of SNPs (134 SNPs) above the threshold  
236 compared with other populations, distributed across 11 chromosomes. We defined 25  
237 genomic regions under selection, most of them located in Ssa26, where the highest |iHS|  
238 scores were also found. Genes such as *uqcrfs1*, *neto1*, *itfg1* and *phkb* were found in these  
239 regions. Ssa24 also presented higher |iHS| values in one of its regions associated with *tchp*,  
240 *ube3b* and *myo1ha* among others. Details of genes and regions can be found in  
241 Supplementary Table S1.

242



### 243 **Candidate regions under selection – XPEHH**

244 We also looked for selection signatures using the XPEHH test between the following  
245 populations pairs: A/B; A/C and A/D (Figure 3). We detected, 437 (A/B), 764 (A/C) and  
246 262 (A/D) XPEHH scores outlier SNPs indicative of selection (Table 3). We considered  
247 potential genomic regions under selection as those containing two or more consecutive  
248 SNPs less than 500 Kb apart and that had XPEHH score > 3. After merging overlapping  
249 regions 27, 25 and 15 candidate regions were identified for A/B, A/C and A/D comparisons  
250 respectively. The total length of the candidate regions was 10.13 Mb for A/B, 12.11 Mb for  
251 A/C and 4.05 Mb for A/D. Comparison between A/C yielded negative results in  
252 chromosome Ssa14 and Ssa16, furthermore comparison A/D yielded negative results in  
253 Ssa14, Ssa24 and Ssa26, suggesting selection in the reference population (A). The gene  
254 annotation revealed in A/B the *plecb* gene on Ssa02 and *myo1cb*, *slc43a2a* and *ywhae1*  
255 genes on Ssa09, associated with the highest values of XPEHH. In A/C the chromosome  
256 Ssa10 presented a large number of SNPs and regions putatively under selection. Also this  
257 chromosome presented the highest scores; genes such as *fnbp11*, *bcar3*, *slc5a9* and *fryl* were  
258 associated with these values. The highest values for A/D were also located on Ssa10 with  
259 *lhx4*, *shr3rf1* and *ftr33* genes. The negative values of XPEHH harboring genes such *agla*,  
260 *kcmf1*, *cds1* and *tshz3b* suggest selection on population A.

261

### 262 **Gene ontology for candidate genes under selection.**

263 To further explore the functions of the candidate genes nearby markers showing evidence  
264 of selection signatures, we annotated the candidate genes detected by both methods using  
265 DAVID browser (<https://david-d.ncicrf.gov>). These candidate genes were enriched in 14  
266 gene ontology terms. None of these categories were common across all four populations,  
267 but Developmental process and Multicellular organismal process were common on Pop B-  
268 C and D. Regulation of biological process was shared for Pop A –B and D; Single-  
269 organism process was common for Pop A –B and C; Biological regulation was found in  
270 Pop-B and Pop-D; and Growth and Locomotion were common for Pop-B and Pop-C.  
271 Anatomical structure development, Biosynthetic process, Cell growth and Single-  
272 multicellular organism process were present only in Pop-A; while Localization and  
273 Signaling were found only in Pop-B (4).

## 274 5. DISCUSSION

275 In this study two complementary tests were used to detect genome wide selection  
276 signatures within and between four Atlantic salmon populations with Norwegian origin.  
277 We used |iHS| test to evaluate selection signatures within populations and XPEHH to  
278 evaluate across populations. We used the oldest population as the reference population  
279 when using XPEHH to evaluate the effect of domestication and artificial selection in three  
280 different locations in Chile.

### 281 **Structure and diversity**

282 To examine genetic population structure and relationships among the major groups of  
283 salmon, we conducted an ADMIXTURE analyses based on high-quality SNP data. This  
284 analysis revealed twelve clusters, which was expected considering the admixed origin of  
285 these populations (VERSPoor *et al.* 2007). The four populations used in this study come  
286 from the Mowi strain, which was created, using samples from several rivers along the west  
287 coast of Norway (NORRIS *et al.* 1999). The population with the lowest level of admixture  
288 was Pop-A, which was also the population with the lowest genetic diversity, a condition  
289 that could reflect a higher intensity of artificial selection in this population. Intense artificial  
290 selection causes loss of genetic variation as a consequence of the mating of related  
291 individuals (GJEDREM 2005). Pop-B and Pop-C showed very similar patterns of  
292 heterozygosity and admixture level, which was expected due to the similar breeding  
293 practices and environmental conditions to which they have been subjected. Pop-D,  
294 however, showed the highest level of heterozygosity and a more complex pattern of  
295 admixture, likely produced by a lower pressure of artificial selection on this population.  
296 Recent genetic introgression cannot be discarded for Pop-D given the potential of crosses  
297 with a different strain for management issues. The results presented here also reinforce the  
298 notion that a few generations (at least four in this particular case) are sufficient to generate  
299 large changes in terms of genetic structure in farmed Atlantic salmon populations, with the  
300 same genetic origin, which have been subjected to different management and  
301 environmental conditions. Estimates of inbreeding coefficient ( $F_{IS}$ ) showed the lowest  
302 value in Pop-D, which is consistent with the heterozygosity level in this population. Pop-A  
303 presented the second lowest value, despite the fact that this population has been subjected

304 to the most intense selection pressure probably due to a better inbreeding management with  
305 the use of DNA fingerprinting technology to know relatedness among individuals in order  
306 to avoid inbreeding.

307

### 308 **Selection signatures**

309 As expected the highest |iHS| scores were found in Pop-A because this population has been  
310 subjected to more intense artificial selection pressures for a longer time. The number of  
311 SNPs under selection detected by this method was similar in Pop-A, Pop-C and Pop-D, but  
312 lower in Pop-B. We suggest that this difference is due to the fact that the |iHS| test has little  
313 power to detect signals near fixation (SABETI *et al.* 2007; SIMIANER *et al.* 2010). XPEHH,  
314 which is more powerful at detecting selection signatures at or near fixation (Sabeti 2007),  
315 detected a similar number of regions putatively under selection in Pop-B and Pop-C, but  
316 lower in Pop-D. Conversely, |iHS| detected more SNP in this population, suggesting loci  
317 under selection in Pop-D have experienced weaker pressure of artificial selection and a  
318 greater impact of natural selection, which has prevented allele fixation. Overlaps among  
319 regions detected by |iHS| method, were found only when using pairs of populations, that is,  
320 a common region was found between Pop-A/B, Pop-A/C, Pop-A/D, Pop-B/C, Pop-B/D and  
321 Pop-C/D. No overlap was found among four populations or when using any combination of  
322 three. XPEHH detected a higher number of shared regions among populations, specifically  
323 in Ssa02, which was common to all 3 tested populations. In addition, shared regions were  
324 found in population pairs B/C and Pop-D/C. A greater number of shared regions detected  
325 by XPEHH could be explained by a greater power to detect regions that have experienced  
326 older selection events (SABETI *et al.* 2007; KLIMENTIDIS *et al.* 2011) than those detectable  
327 by |iHS|. Therefore, these regions may be explaining selection signatures that originated  
328 before these populations were brought to Chile.

### 329 **Domestication traits in salmon**

330 Selection signatures found in this study may be involved in some desirable economic traits  
331 in salmon production as well as traits that are typically under the effect of domestication.  
332 All populations used in this study have been subjected to artificial selection to improve  
333 growth rate. According to the functional annotations of the candidate genes, several

334 biological processes were found to be involved with growth and development, such as the  
335 Development process and Regulation of Biological/metabolic processes. Additionally,  
336 some of the genes identified have been associated with growth traits in other species; such  
337 *sh3rf1* in chicken and cattle (HANOTTE *et al.* 2003; RUBIN *et al.* 2010) or *igflr*, which was  
338 previously found to be a size locus of large effect in dogs (SUTTER *et al.* 2007; HOOPES *et*  
339 *al.* 2012). We suggest that these genes may be under selection for improving growth related  
340 traits in salmon. On the other hand, we also identified genes such *scaper*, *clstn3* and *pex5*  
341 related to mental disorders in humans (GLATT *et al.* 2005; PETTEM *et al.* 2013). Other genes  
342 related to behavioral traits have be found in other Atlantic salmon strains, as well (Lopez et  
343 al, 2018), suggesting that artificial selection acts on behavioral traits in salmon as in other  
344 domestic animals (Clutton-Brock 1999).

345

## 346 **6. CONCLUSIONS**

347 In the present study, several candidate genomic regions with selection signatures were  
348 identified using two haplotype based methods, |iHS| and XPEHH in four populations of  
349 Atlantic salmon. These genomic regions harbored important genes that enriched G terms  
350 including growth, developmental processes, and have been associated with growth and  
351 behavior in other species. These finding improve our understanding of genomic variants  
352 undergoing selection in domestic populations of Atlantic salmon.

353

### 354 **Ethics approval and consent to participate**

355 The sampling protocol was previously approved by The Comité de Bioética Animal,  
356 Facultad de Ciencias Veterinarias y Pecuarias, Universidad de Chile (Certificate N° 29–  
357 2014).

358

### 359 **Consent for publication**

360 Not applicable

361

362 **Availability of data and material**

363 Genotype data for each population is available from the online digital repository *figshare*  
364 <https://figshare.com/s/83efa70722ed5ada023a>

365

366 **Competing Interest**

367 The authors have no conflicts of interest to declare

368

369 **Funding**

370 This work has been conceived on the frame of the grant CORFO (11IEI-12843 and  
371 12PIE17669), Government of Chile.

372 **Author's contributions**

373 MEL and JMY conceived the research idea. MEL drafted the manuscript and carried out  
374 the analyses. TL supervised the data analyses and contributed to discussion and writing.  
375 TL, AN, JPL, RN, and JMY reviewed the manuscript. All authors read and approved the  
376 final manuscript.

377

378

379

380 **Acknowledgements**

381 MEL acknowledges the National Commission of Scientific and Technologic Research  
382 (CONICYT) for the funding through the National PhD funding program. JMY is supported  
383 by Núcleo Milenio INVASAL funded by Chile's government program, Iniciativa Científica  
384 Milenio from Ministerio de Economía, Fomento y Turismo

385

386

387

388 **REFERENCES**

- 389
- 390
- 391 Alexander, D. H., J. Novembre and K. Lange, 2009 Fast model-based estimation of  
392 ancestry in unrelated individuals. *Genome Research*.
- 393 Altschul, S. F., W. Gish, W. Miller, E. W. Myers and D. J. Lipman, 1990 Basic local  
394 alignment search tool. *J Mol Biol* 215: 403-410.
- 395 Amaral, A. J., L. Ferretti, H.-J. Megens, R. P. M. A. Crooijmans, H. Nie *et al.*, 2011  
396 Genome-Wide Footprints of Pig Domestication and Selection Revealed through  
397 Massive Parallel Sequencing of Pooled DNA. *PLoS ONE* 6: e14782.
- 398 Andersson, L., 2012 How selective sweeps in domestic animals provide new insight into  
399 biological mechanisms. *Journal of Internal Medicine* 271: 1-14.
- 400 Bahbahani, H., H. Clifford, D. Wragg, M. N. Mbole-Kariuki, C. Van Tassell *et al.*, 2015  
401 Signatures of positive selection in East African Shorthorn Zebu: A genome-wide  
402 single nucleotide polymorphism analysis. *Scientific reports* 5.
- 403 Bicskei, B., J. E. Bron, K. A. Glover and J. B. Taggart, 2014 A comparison of gene  
404 transcription profiles of domesticated and wild Atlantic salmon (*Salmo salar* L.) at  
405 early life stages, reared under controlled conditions. *BMC Genomics* 15: 884.
- 406 Browning, B., and S. Browning, 2009 A unified approach to genotype imputation and  
407 haplotype-phase inference for large data sets of trios and unrelated individuals. *Am*  
408 *J Hum Genet* 84: 210 - 223.
- 409 Christie, M. R., M. L. Marine, S. E. Fox, R. A. French and M. S. Blouin, 2016 A single  
410 generation of domestication heritably alters the expression of hundreds of genes.  
411 *Nature Communications* 7: 10676.
- 412 Cingolani, P., A. Platts, L. Wang, M. Coon, T. Nguyen *et al.*, 2012 A program for  
413 annotating and predicting the effects of single nucleotide polymorphisms, SnpEff:  
414 SNPs in the genome of *Drosophila melanogaster* strain w1118; iso-2; iso-3. *Fly* 6:  
415 80-92.
- 416 Clutton-Brock, J., 1999 *A natural history of domesticated mammals*. Cambridge University  
417 Press.
- 418 Einum, S., and I. Fleming, 1997 Genetic divergence and interactions in the wild among  
419 native, farmed and hybrid Atlantic salmon. *J Fish Biol* 50.
- 420 FAO, 2016 *The State of World Fisheries and Aquaculture 2016*.  
421 *Contributing to food security and nutrition for all.*: 200 pp.
- 422 Fariello, M.-I., B. Servin, G. Tosser-Klopp, R. Rupp, C. Moreno *et al.*, 2014 Selection  
423 Signatures in Worldwide Sheep Populations. *PLoS ONE* 9: e103813.
- 424 Flori, L., S. Fritz, F. Jaffre zic, M. Boussaha, I. Gut *et al.*, 2009 The genome response to  
425 artificial selection: a case study in dairy cattle. *PLoS ONE* 4: e6595.
- 426 Frischknecht, M., C. Flury, T. Leeb, S. Rieder and M. Neuditschko, 2016 Selection  
427 signatures in Shetland ponies. *Animal genetics*.
- 428 Gautier, M., and R. Vitalis, 2012 rehh: an R package to detect footprints of selection in  
429 genome-wide SNP data from haplotype structure. *Bioinformatics* 28: 1176-1177.
- 430 Gjedrem, T., 2005 *Selection and Breeding Programs in Aquaculture*. Springer, Dordrecht,  
431 The Netherlands.
- 432 Gjedrem, T., N. Robinson and M. Rye, 2012 The importance of selective breeding in  
433 aquaculture to meet future demands for animal protein: A review. *Aquaculture* 350–  
434 353: 117-129.

- 435 Glatt, S. J., I. P. Everall, W. S. Kremen, J. Corbeil, R. Sásik *et al.*, 2005 Comparative gene  
436 expression analysis of blood and brain provides concurrent validation of  
437 SELENBP1 up-regulation in schizophrenia. *Proceedings of the National Academy*  
438 *of Sciences of the United States of America* 102: 15533-15538.
- 439 Glover, K., H. Ottera, R. Olsen, E. Slinde, G. Taranger *et al.*, 2009 A comparison of  
440 farmed, wild and hybrid Atlantic salmon (*Salmo salar* L.) reared under farming  
441 conditions. *Aquaculture* 286.
- 442 Gutierrez, A. P., J. M. Yáñez and W. S. Davidson, 2015 Evidence of recent signatures of  
443 selection during domestication in an Atlantic salmon population. *Marine Genomics*.
- 444 Hanotte, O., Y. Ronin, M. Agaba, P. Nilsson, A. Gelhaus *et al.*, 2003 Mapping of  
445 quantitative trait loci controlling trypanotolerance in a cross of tolerant West  
446 African N'Dama and susceptible East African Boran cattle. *Proceedings of the*  
447 *National Academy of Sciences of the United States of America* 100: 7443-7448.
- 448 Hong Xia, J., Z. Bai, Z. Meng, Y. Zhang, L. Wang *et al.*, 2015 Signatures of selection in  
449 tilapia revealed by whole genome resequencing. *Scientific Reports* 5: 14168.
- 450 Hoopes, B. C., M. Rimbault, D. Liebers, E. A. Ostrander and N. B. Sutter, 2012 The  
451 insulin-like growth factor 1 receptor (IGF1R) contributes to reduced size in dogs.  
452 *Mammalian genome : official journal of the International Mammalian Genome*  
453 *Society* 23: 780-790.
- 454 Kijas, J. W., J. A. Lenstra, B. Hayes, S. Boitard, L. R. Porto Neto *et al.*, 2012 Genome-  
455 Wide Analysis of the World's Sheep Breeds Reveals High Levels of Historic  
456 Mixture and Strong Recent Selection. *PLoS Biol* 10: e1001258.
- 457 Klimentidis, Y. C., M. Abrams, J. Wang, J. R. Fernandez and D. B. Allison, 2011 Natural  
458 selection at genomic regions associated with obesity and type-2 diabetes: East  
459 Asians and sub-Saharan Africans exhibit high levels of differentiation at type-2  
460 diabetes regions. *Human genetics* 129: 407-418.
- 461 Lien, S., B. F. Koop, S. R. Sandve, J. R. Miller, M. P. Kent *et al.*, 2016 The Atlantic  
462 salmon genome provides insights into rediploidization. *Nature* 533: 200-205.
- 463 Liu, L., K. P. Ang, J. A. K. Elliott, M. P. Kent, S. Lien *et al.*, 2016 A genome scan for  
464 selection signatures comparing farmed Atlantic salmon with two wild populations:  
465 Testing colocalization among outlier markers, candidate genes, and quantitative trait  
466 loci for production traits. *Evolutionary applications* 10: 276-296.
- 467 López, M. E., L. Benestan, J. S. Moore, C. Perrier, J. Gilbey *et al.*, 2018 Comparing  
468 genomic signatures of domestication in two Atlantic salmon (*Salmo salar* L)  
469 populations with different geographical origins. *Evolutionary Applications* 0.
- 470 Mäkinen, H., A. Vasemägi, P. McGinnity, T. F. Cross and C. R. Primmer, 2014 Population  
471 genomic analyses of early-phase Atlantic Salmon (*Salmo salar*)  
472 domestication/captive breeding. *Evolutionary Applications* 8: 93-107.
- 473 Norris, A., 1999 Microsatellite genetic variation between and within farmed and wild  
474 Atlantic salmon (*Salmo salar*) populations. *Aquaculture* 180.
- 475 Norris, A. T., D. G. Bradley and E. P. Cunningham, 1999 Microsatellite genetic variation  
476 between and within farmed and wild Atlantic salmon (*Salmo salar*) populations.  
477 *Aquaculture* 180.
- 478 Oleksyk, T. K., M. W. Smith and S. J. O'Brien, 2010 Genome-wide scans for footprints of  
479 natural selection. *Philosophical Transactions of the Royal Society B: Biological*  
480 *Sciences* 365: 185-205.

- 481 Petersen, J. L., J. R. Mickelson, A. K. Rendahl, S. J. Valberg, L. S. Andersson *et al.*, 2013  
482 Genome-wide analysis reveals selection for important traits in domestic horse  
483 breeds. *PLoS Genet* 9.
- 484 Pettem, K. L., D. Yokomaku, L. Luo, M. W. Linhoff, T. Prasad *et al.*, 2013 The specific  $\alpha$ -  
485 neurexin interactor calsynenin-3 promotes excitatory and inhibitory synapse  
486 development. *Neuron* 80: 113-128.
- 487 Roberge, C., S. Einum, H. Guderley and L. Bernatchez, 2006 Rapid parallel evolutionary  
488 changes of gene transcription profiles in farmed Atlantic salmon. *Molecular*  
489 *Ecology* 15: 9-20.
- 490 Rubin, C.-J., M. C. Zody, J. Eriksson, J. R. S. Meadows, E. Sherwood *et al.*, 2010 Whole-  
491 genome resequencing reveals loci under selection during chicken domestication.  
492 *Nature* 464: 587-591.
- 493 Sabeti, P., D. Reich, J. Higgins, H. Levine, D. Richter *et al.*, 2002 Detecting recent positive  
494 selection in the human genome from haplotype structure. *Nature* 419: 832 - 837.
- 495 Sabeti, P., S. Schaffner, B. Fry, J. Lohmueller, P. Varilly *et al.*, 2006 Positive natural  
496 selection in the human lineage. *Science* 3129: 1614 - 1620.
- 497 Sabeti, P., P. Varilly, B. Fry, J. Lohmueller, E. Hostetter *et al.*, 2007 Genome-wide  
498 detection and characterization of positive selection in human populations. *Nature*  
499 449: 913 - 918.
- 500 Simianer, H., S. Qanbari and D. Gianola, 2010 Detection of selection signatures within and  
501 between cattle populations. *Proceedings of 9th World Congress on Genetics*  
502 *Applied to Livestock Production*.
- 503 Solberg, M. F., B. O. Kvamme, F. Nilsen and K. Glover, 2012 Effects of environmental  
504 stress on mRNA expression levels of seven genes related to oxidative stress and  
505 growth in Atlantic salmon *Salmo salar* L. of farmed, hybrid and wild origin. *BMC*  
506 *Res Notes* 5.
- 507 Sutter, N. B., C. D. Bustamante, K. Chase, M. M. Gray, K. Zhao *et al.*, 2007 A single IGF1  
508 allele is a major determinant of small size in dogs. *Science (New York, N.Y.)* 316:  
509 112-115.
- 510 Thodesen, J., B. Grisdale-Helland, S. J. Helland and B. Gjerde, 1999 Feed intake, growth  
511 and feed utilization of offspring from wild and selected Atlantic salmon (*Salmo*  
512 *salar*). *Aquaculture* 180: 237-246.
- 513 Vasemägi, A., J. Nilsson, P. McGinnity, T. Cross, P. O'Reilly *et al.*, 2012 Screen for  
514 Footprints of Selection during Domestication/Captive Breeding of Atlantic Salmon.  
515 *Comparative and Functional Genomics* 2012: 1-14.
- 516 Vasemägi, A., J. Nilsson and C. R. Primmer, 2005 Expressed sequence tag-linked  
517 microsatellites as a source of gene-associated polymorphisms for detecting  
518 signatures of divergent selection in Atlantic salmon (*Salmo salar* L.). *Mol Biol Evol*  
519 22: 1067-1076.
- 520 Verspoor, E., L. Stradmeyer and J. L. Nielsen, 2007 *The Atlantic salmon: genetics,*  
521 *conservation and management*. John Wiley & Sons.
- 522 Voight, B., S. Kudaravalli, X. Wen and J. Pritchard, 2006 A map of recent positive  
523 selection in the human genome. *PLoS Biology* 4: e72.
- 524 Yáñez, J. M., S. Naswa, M. E. López, L. Bassini, K. Correa *et al.*, 2016 Genomewide  
525 single nucleotide polymorphism discovery in Atlantic salmon (*Salmo salar*):  
526 validation in wild and farmed American and European populations. *Molecular*  
527 *Ecology Resources*: n/a-n/a.



528  
529  
530  
531  
532  
533  
534  
535  
536  
537  
538  
539  
540  
541  
542  
543  
544  
545  
546  
547  
548  
549  
550  
551  
552  
553  
554  
555  
556  
557  
558  
559  
560  
561  
562  
563  
564  
565  
566  
567  
568  
569  
570  
571  
572

**Table 1.** Mean genetic diversity (Observed heterozygosity and expected heterozygosity) of four Atlantic salmon populations

| Population | H <sub>o</sub> | H <sub>e</sub> |
|------------|----------------|----------------|
| Pop-A      | 0.38±0.16      | 0.37±0.15      |
| Pop-B      | 0.40±0.15      | 0.39±0.14      |
| Pop-C      | 0.40±0.14      | 0.39±0.13      |
| Pop-D      | 0.46±0.22      | 0.37±0.16      |

573  
574  
575  
576  
577  
578  
579  
580  
581  
582  
583  
584  
585  
586  
587  
588  
589  
590  
591  
592  
593  
594  
595  
596  
597  
598  
599  
600  
601  
602  
603  
604  
605  
606  
607  
608  
609  
610

611

**Table 2.** Number of SNPs identified by |iHS| among populations and chromosomes.

|       | Pop-A | Pop-B | Pop-C | Pop-D |
|-------|-------|-------|-------|-------|
| Ssa01 | 14    | 11    | 2     | 15    |
| Ssa02 | 31    |       |       |       |
| Ssa03 |       |       |       | 9     |
| Ssa04 |       |       |       | 1     |
| Ssa05 | 2     | 1     | 5     |       |
| Ssa06 | 1     | 6     |       |       |
| Ssa07 | 3     |       |       |       |
| Ssa08 |       |       |       |       |
| Ssa09 | 6     |       | 2     |       |
| Ssa10 | 43    | 3     | 6     | 14    |
| Ssa11 |       |       | 2     |       |
| Ssa12 | 3     | 7     |       | 1     |
| Ssa13 | 4     | 16    | 3     | 2     |
| Ssa14 | 4     | 3     | 4     | 4     |
| Ssa15 | 6     | 2     | 1     |       |
| Ssa16 | 1     | 5     | 32    |       |
| Ssa17 |       |       |       | 1     |
| Ssa18 |       |       |       |       |
| Ssa19 |       | 2     | 15    |       |
| Ssa20 |       |       |       | 18    |
| Ssa21 |       |       |       |       |
| Ssa22 | 2     |       | 49    |       |
| Ssa23 |       |       |       |       |
| Ssa24 |       |       |       | 15    |
| Ssa25 |       |       |       |       |
| Ssa26 |       |       |       | 54    |
| Ssa27 |       | 2     |       |       |
| Ssa28 |       |       |       |       |
| Ssa29 |       |       |       |       |
| Total | 120   | 58    | 121   | 134   |

612

613

614

615

616

617

618

619

620

621

**Table 3.** SNPs and regions under selection identified by *XPEHH* among population pairs and chromosomes.

|       | Pop-A/Pop-B |         | Pop-A/Pop-C |         | Pop-A/Pop-D |         |
|-------|-------------|---------|-------------|---------|-------------|---------|
|       | SNPs        | Regions | SNPs        | Regions | SNPs        | Regions |
| Ssa01 |             |         |             |         |             |         |
| Ssa02 | 68          | 3       | 82          | 5       | 17          | 2       |
| Ssa03 |             |         |             |         |             |         |
| Ssa04 |             |         |             |         |             |         |
| Ssa05 | 11          | 1       |             |         | 26          | 3       |
| Ssa06 |             |         |             |         |             |         |
| Ssa07 |             |         |             |         |             |         |
| Ssa08 |             |         |             |         |             |         |
| Ssa09 | 289         | 17      | 71          | 3       | 6           | 1       |
| Ssa10 | 16          | 2       | 571         | 13      | 154         | 4       |
| Ssa11 |             |         |             |         | 10          | 2       |
| Ssa12 |             |         |             |         |             |         |
| Ssa13 |             |         |             |         |             |         |
| Ssa14 |             |         | 1           |         | 8           | 1       |
| Ssa15 |             |         | 7           | 1       |             |         |
| Ssa16 |             |         | 25          | 1       |             |         |
| Ssa17 |             |         |             |         |             |         |
| Ssa18 |             |         |             |         |             |         |
| Ssa19 |             |         |             |         |             |         |
| Ssa20 |             |         |             |         |             |         |
| Ssa21 |             |         |             |         |             |         |
| Ssa22 |             |         |             |         |             |         |
| Ssa23 |             |         |             |         |             |         |
| Ssa24 | 53          | 4       |             |         | 8           | 1       |
| Ssa25 |             |         |             |         |             |         |
| Ssa26 |             |         |             |         | 32          | 1       |
| Ssa27 |             |         |             |         |             |         |
| Ssa28 |             |         |             |         |             |         |
| Ssa29 |             |         | 7           | 2       | 1           |         |
| Total | 437         | 27      | 764         | 25      | 262         | 15      |

622  
623  
624  
625  
626  
627  
628  
629  
630  
631

632 **Figure legends**

633

634 **Figure 1.** Individual assignment probabilities generated with ADMIXTURE (1•K•12). Each  
635 color represents a cluster, and the ratio of vertical lines is proportional to assignment  
636 probability of and individual to each cluster.

637

638

639 **Figure 2.** Genome-wide distribution of  $-\log_{10}(\text{p-value})$  of standardized Integrated Haplotype  
640 Score |iHS| among Atlantic salmon populations.

641

642 **Figure 3.** Genome-wide distribution of  $-\log_{10}(\text{p-value})$  of standardized cross-population  
643 extended haplotype homozygosity (XP-EHH) scores in pairwise Atlantic salmon populations.

644

645

646 **Figure 4.** GO enrichment analysis of genes with evidence of selection in Atlantic salmon. GO  
647 functional classification was performed using the DAVID browser.

648

649

650

651

652

653

654

655

656

657

658

659

660

661

662

663

664

665

666

667

668

669

670

671

672

673

674

675

676

677

678

679 **Figure 1**

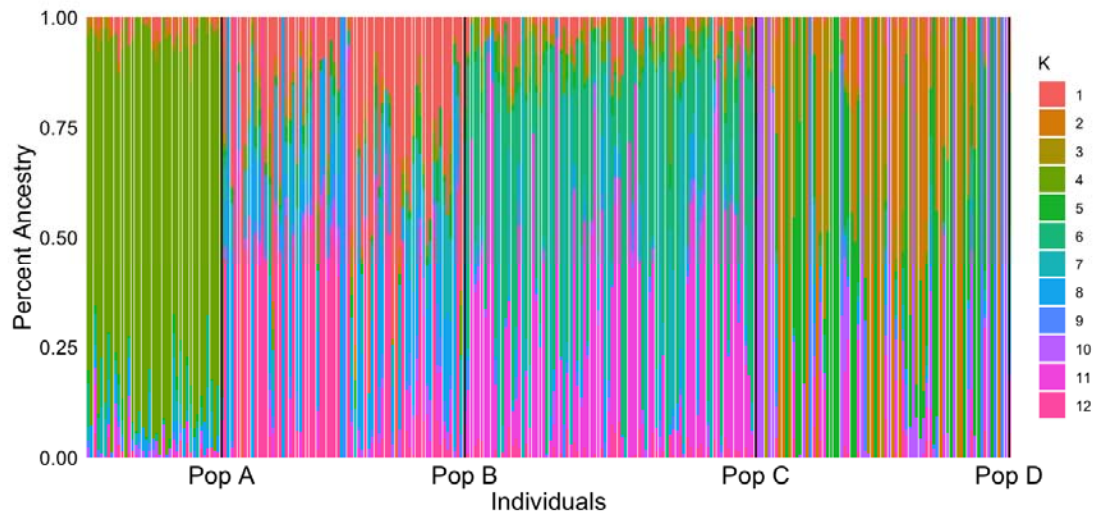

680  
681  
682  
683  
684  
685  
686  
687  
688  
689  
690  
691  
692  
693  
694  
695  
696  
697  
698  
699  
700  
701  
702  
703  
704  
705  
706  
707  
708

709 **Figure 2**  
710  
711

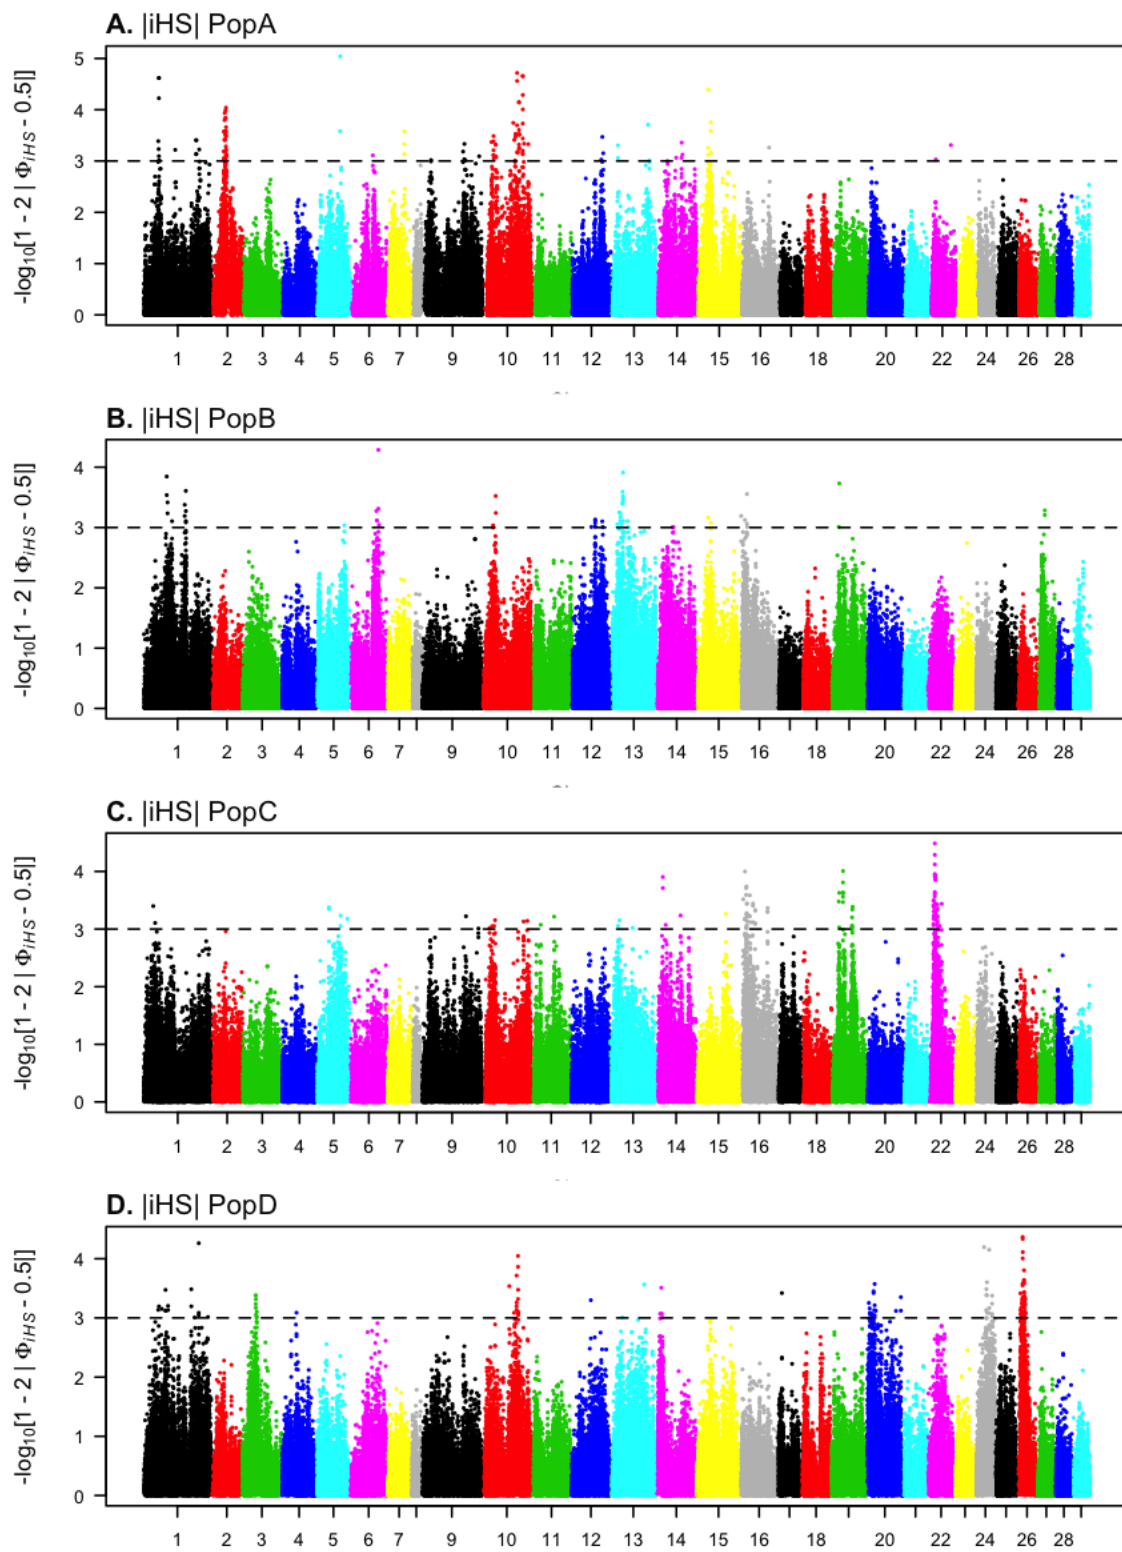

712

713 **Figure 3**  
714  
715

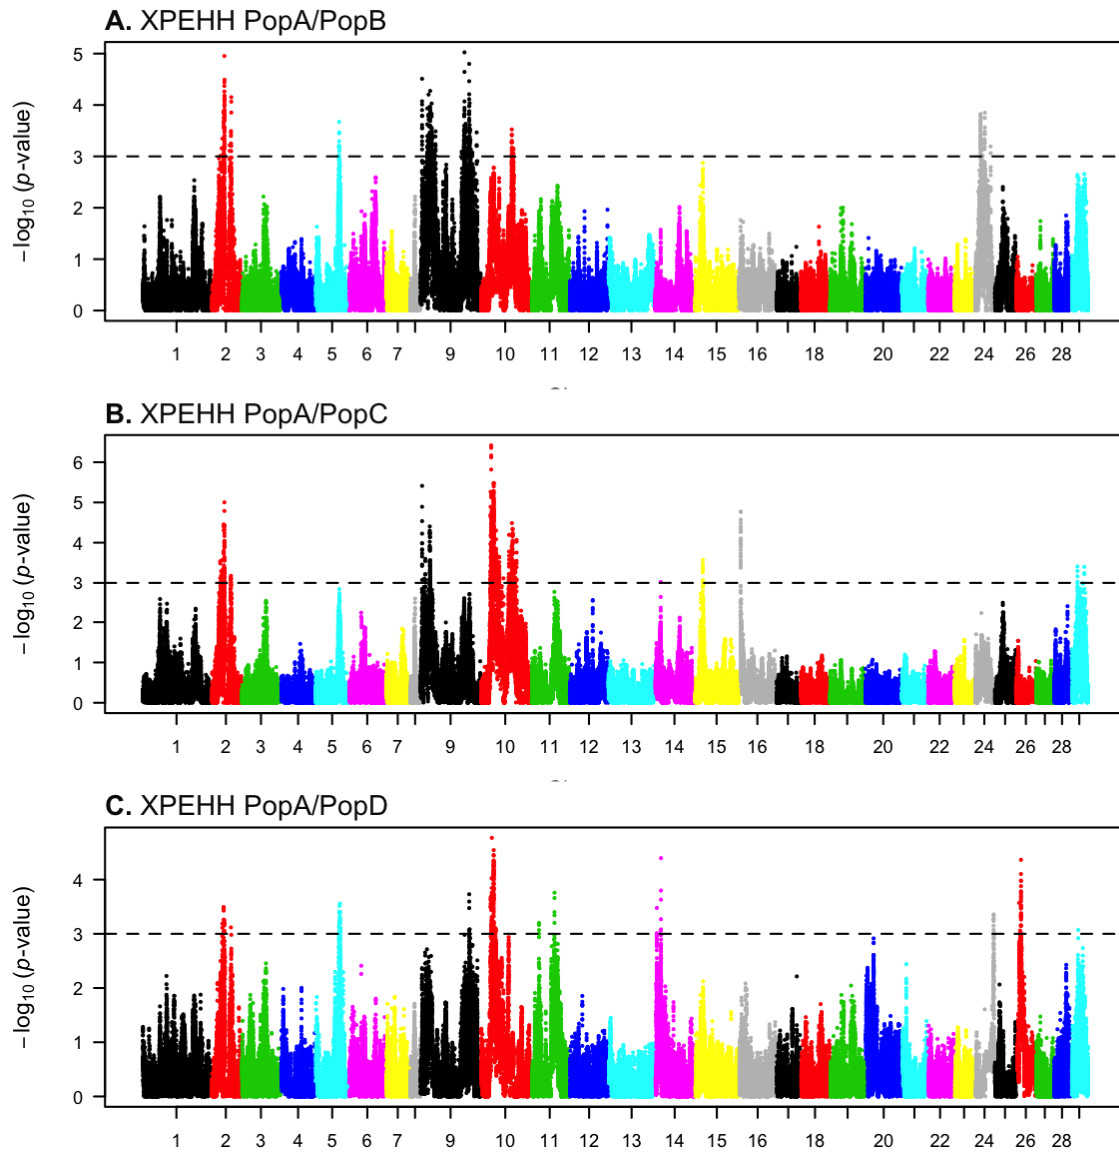

716  
717  
718  
719  
720  
721  
722  
723  
724  
725  
726  
727  
728



729 **Figure 4**

730

731

732

733

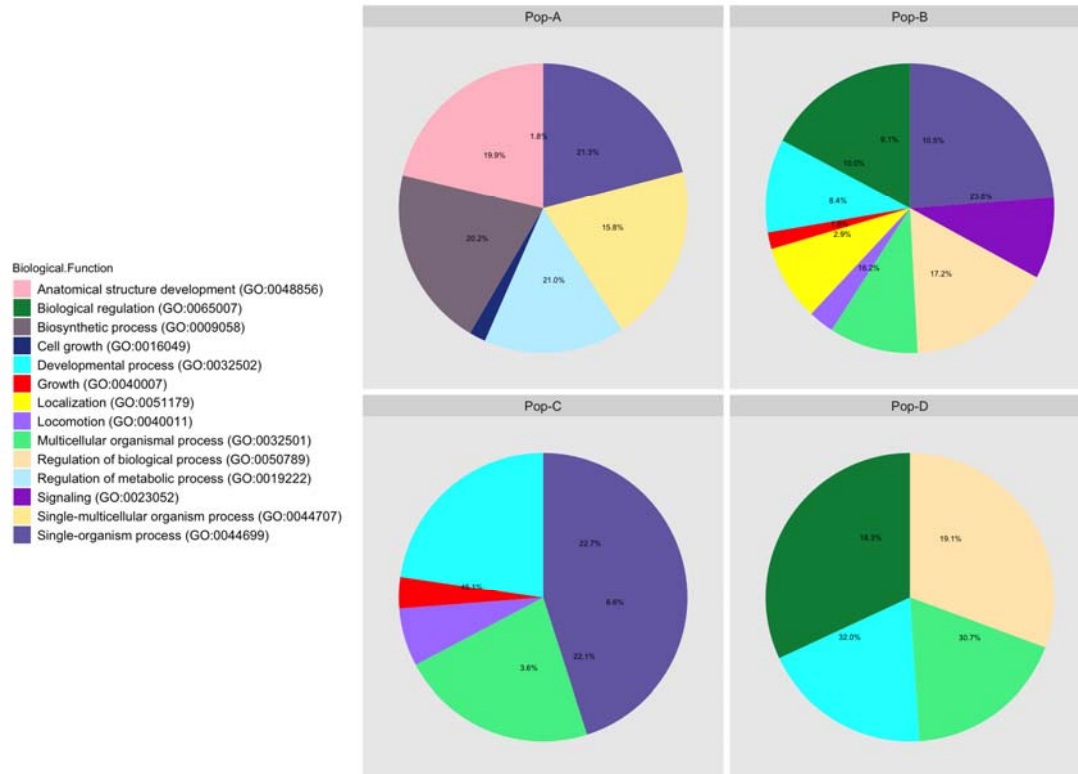

734
